# Supplementary material for: LRRK2 Antisense Oligonucleotides Ameliorate α-Synuclein Inclusion Formation in a Parkinson’s Disease Mouse Model
Source: PubMed Central journal article supplement — Mol Ther Nucleic Acids. 2017 Aug 10;8:508–19. doi: 10.1016/j.omtn.2017.08.002 (PMC5573879; doi:10.1016/j.omtn.2017.08.002), 2017-08-10
Supplement: mmc1.pdf [file mmc1.pdf]

OMTN, Volume 8

## **Supplemental Information**

### **LRRK2 Antisense Oligonucleotides Ameliorate**

### **$\alpha$ -Synuclein Inclusion Formation**

### **in a Parkinson's Disease Mouse Model**

**Hien Tran Zhao, Neena John, Vedad Delic, Karli Ikeda-Lee, Aneza Kim, Andreas Weihofen, Eric E. Swayze, Holly B. Kordasiewicz, Andrew B. West, and Laura A. Volpicelli-Daley**

Fig. S1

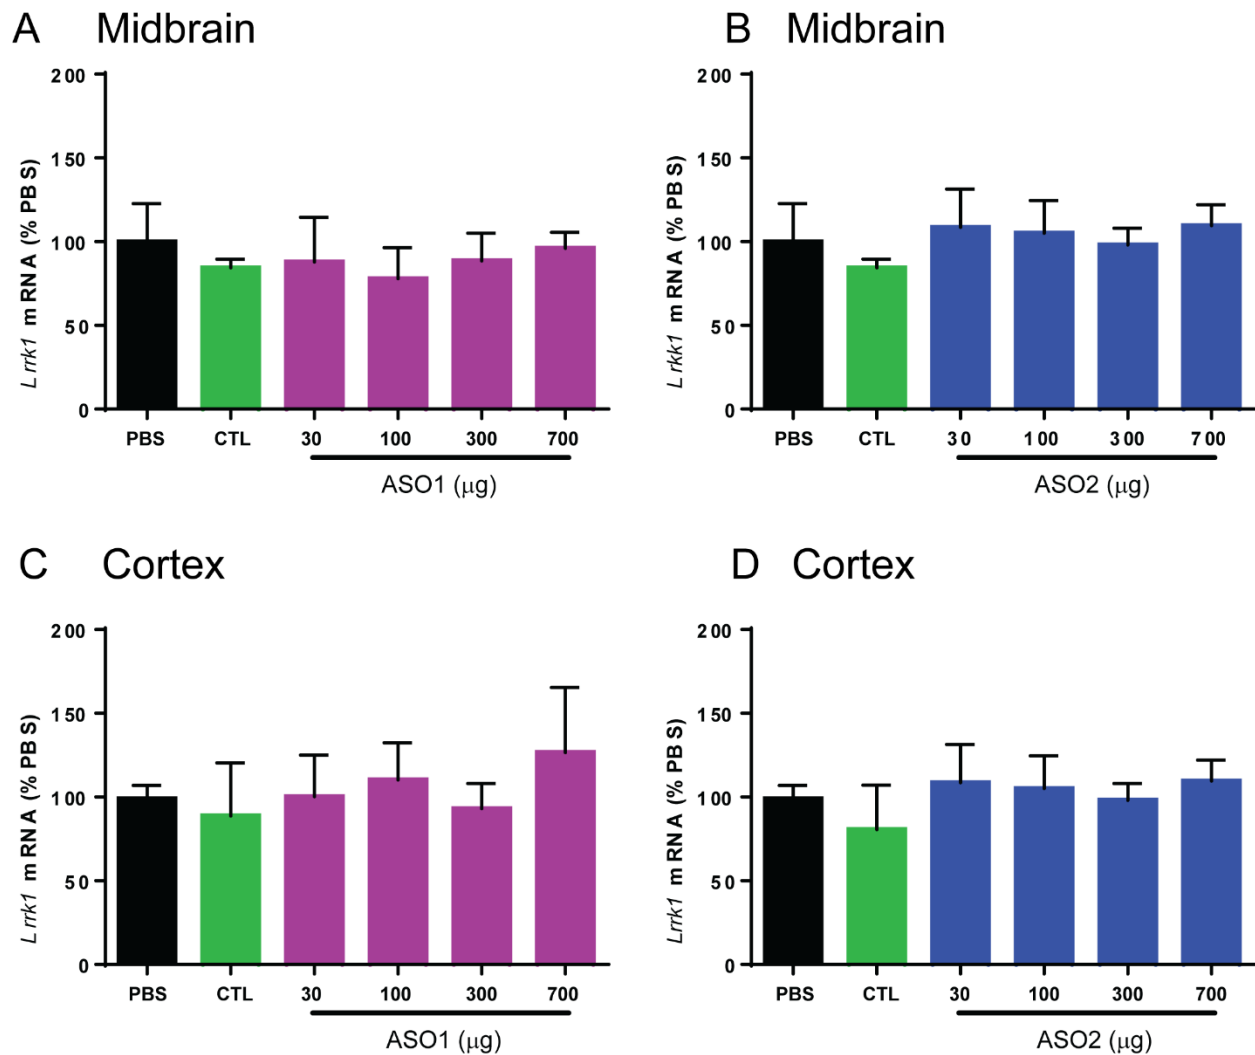

**Fig. S1. No change in *Lrrk1* mRNA levels in the midbrain and cortex following LRRK2 ASO treatment.** C57BL/6J mice received ICVB treatments with PBS (N=3), 700  $\mu$ g CTRL (N=3), or LRRK2 ASO1 (N=3), or LRRK2 ASO2 (N=3) at 30, 100, 300 or 700  $\mu$ g, respectively. Fourteen days later, brains were dissected and *Lrrk1* mRNA was quantified by RT-qPCR in the midbrain (A,B) and cortex (C,D) Data represents % PBS  $\pm$  SEM. LRRK2 ASO-treated groups were compared to PBS or CTL-treated groups using one-way ANOVA with Tukey's post-test.

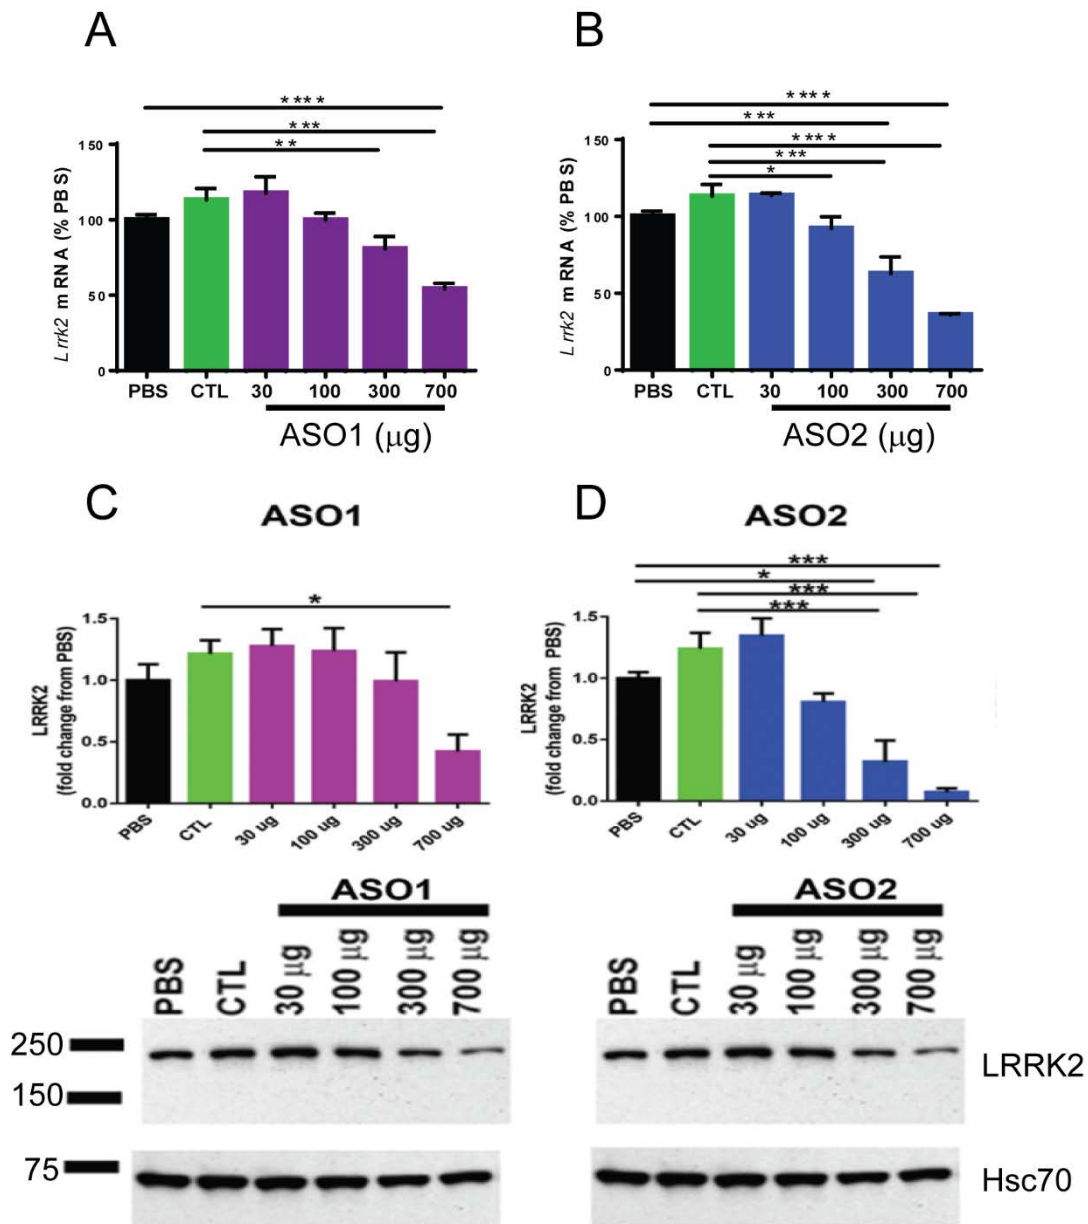

**Fig. S2. Dose-dependent reduction of *Lrrk2* mRNA and LRRK2 protein in the cortex in LRRK2 ASO-treated mice. A,B.** C57BL/6J mice received ICVB treatments with PBS (N=3), 700  $\mu$ g CTRL (N=3), or LRRK2 ASO1 (N=3), or LRRK2 ASO2 (N=3) at 30, 100, 300 or 700  $\mu$ g, respectively. Fourteen days later, brains were dissected. *Lrrk2* mRNA in the cortex was

quantified by RT-qPCR. **C,D.** Cortex homogenates from treated mice were immunoblotted for total LRRK2. HSC70 was used as a loading control. Bands from the LRRK2 immunoblots were quantified using ImageJ and normalized to HSC70. Data represents mean fold change relative PBS +/- SEM. LRRK2 ASO-treated groups were compared to PBS or CTL-ASO groups using one-way ANOVA with Tukey's post-test. \*  $P < 0.05$ , \*\*  $P < 0.01$ , and \*\*\*  $P < 0.001$ .

Fig. S3

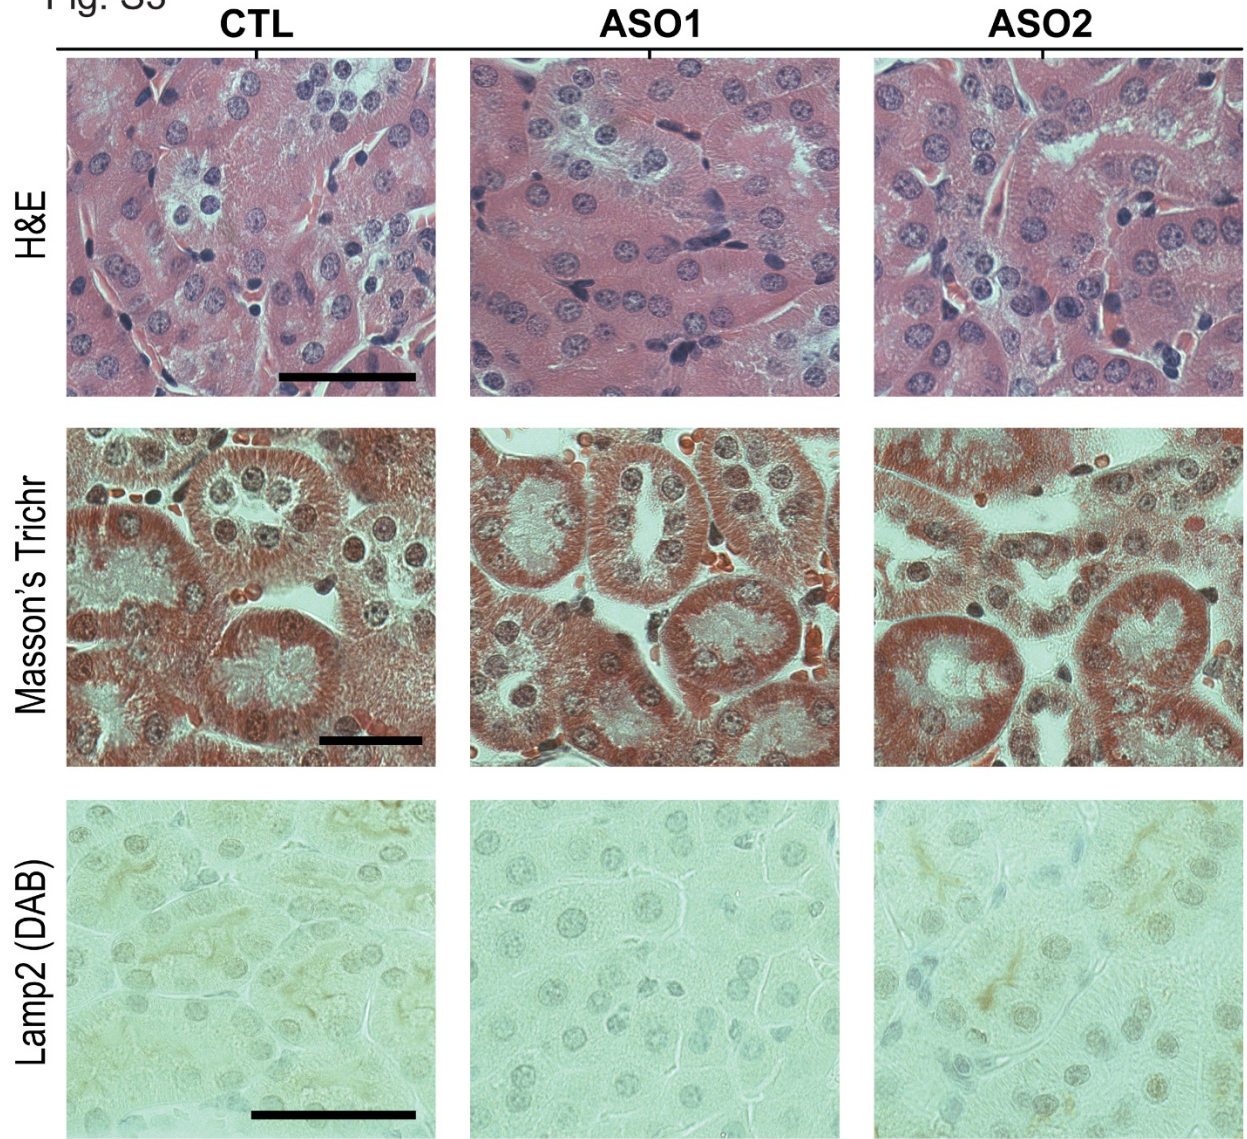

**B**

Lung

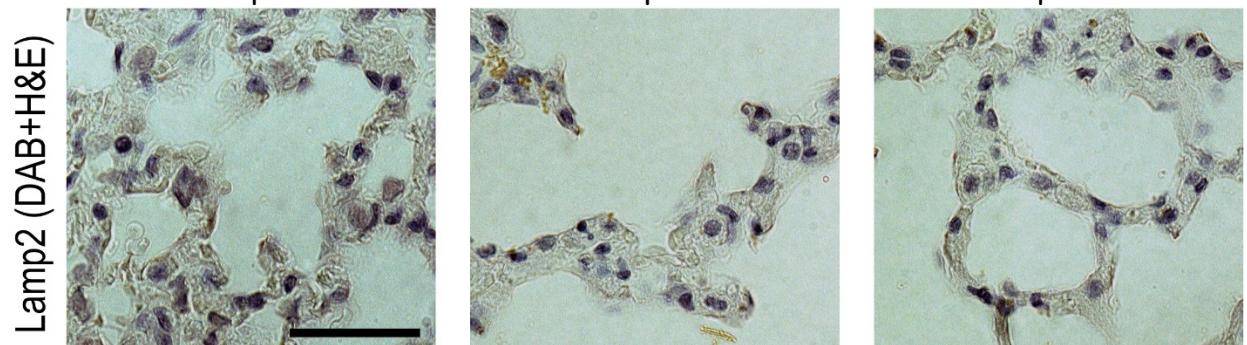

**Figure S3. No histological change observed in kidney and lung following central administration of LRRK2-ASOs.** **A.** To visualize the presence of vacuoles in proximal kidney epithelial cells, sections from kidney from ICVB treated mice receiving CTRL, LRRK2 ASO1 or LRRK2 ASO2 were stained using H&E, or **B.** Masson's Trichrome stain to visualize protein deposits. **C.** LAMP2 immunohistochemistry was also performed to visualize late endosomes/lysosomes in tubule cells. Sections shown are representative from dozens of sections cut through the kidney and lung from at least three animals from each group. Scale bars are 100  $\mu\text{m}$ .

Fig. S4

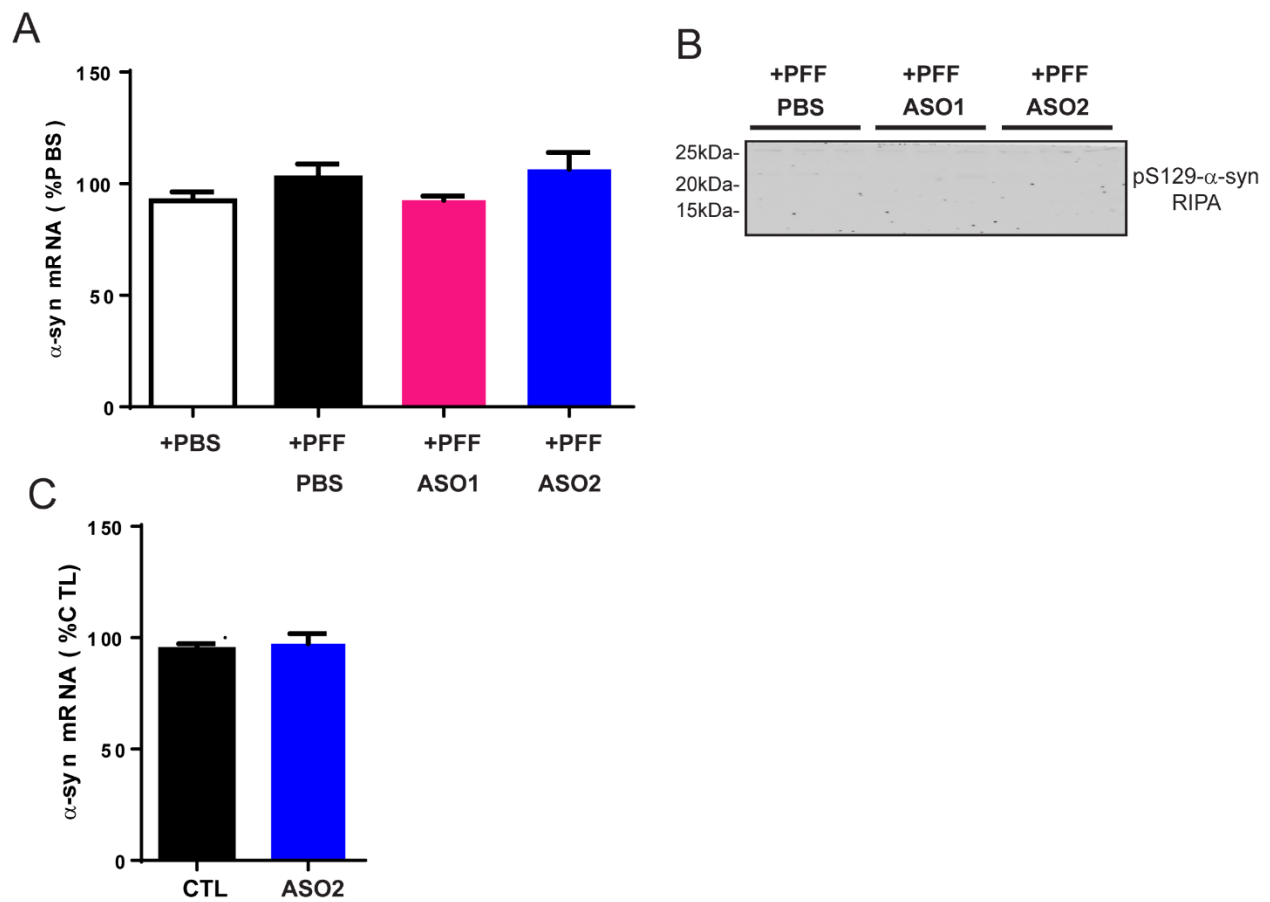

**Fig. S4. No change in SNCA mRNA levels or RIPA-soluble pS129- $\alpha$ -syn in PFF-injected**

**mice treated with LRRK2 ASOs. A.** Mice received ICVB injections of PBS, LRRK2 ASO1 (700  $\mu$ g), LRRK2 ASO2 (700  $\mu$ g). Fourteen days later, 5  $\mu$ g of PFFs were unilaterally injected into the right striatum. Fifty-six days later, mice were sacrificed. *SNCA* mRNA was assessed in the contralateral midbrain by RT-qPCR (N=11-12). LRRK2 ASO-treated groups were compared to PBS or CTL-treated groups using one-way ANOVA with Tukey's post-test. **B.** Contralateral cortex of PFF injected mice treated with PBS, ASO1 or ASO2 were extracted in RIPA buffer and western blotted with pS129- $\alpha$ -syn for pathological  $\alpha$ -syn (N=3 per group). **C.** Mice received ICVB injections of CTL ASO (700  $\mu$ g) or LRRK2 ASO2 (700  $\mu$ g). Fourteen days later, 5  $\mu$ g of PFFs were unilaterally injected into the striatum. Ninety days later, mice received additional ICVB injections of CTL ASO (700  $\mu$ g) or LRRK2 ASO2 (700  $\mu$ g). The mice were sacrificed 180 days after the first ASO injection. *SNCA* mRNA was assessed in the midbrain RT-qPCR (N=6). LRRK2 ASO-treated group was compared to CTL group using student's t-test.
